# Supplementary material for: In silicoscreening applied in drug discovery: T001-10026247 as a novel fourth-generation EGFR inhibitor
Source: Royal Society of Chemistry journal article supplement (doi:10.1039/d3nj03597b), 2023-01-01
Supplement: d3nj03597b2.pdf [file d3nj03597b2.pdf]

## Supporting Information

### **In silico screening applied in drug discovery: T001-10026247 as a novel fourth-generation EGFR inhibitor**

Shidi Xu<sup>a,†</sup>, Xiaoling Huang<sup>a,b,†</sup>, Yufeng An<sup>a</sup>, Xinya Lv<sup>a</sup>, Shan Xu<sup>a</sup>, Linxiao Wang<sup>a,\*</sup>, Wufu Zhu<sup>a,\*</sup>

<sup>a</sup> Jiangxi Provincial Key Laboratory of Drug Design and Evaluation, School of Pharmacy, Jiangxi Science & Technology Normal University, 605 Fenglin Road, Nanchang, Jiangxi 330013, China

---

<sup>†</sup> These authors made equal contributions to this work.

\* Corresponding authors.

Tel. & Fax: +86 791 8380-2393;

E-mail addresses: zhuwufu-1122@163.com (Wufu Zhu), wanglinxiao542@163.com (Linxiao Wang).

**Table S1. ROC curve data**

| ID          | TYPE <sup>a</sup> | 5ZWJ                | 6JRJ                | 6LUD                |
|-------------|-------------------|---------------------|---------------------|---------------------|
|             |                   | Affinity (Kcal/mol) | Affinity (Kcal/mol) | Affinity (Kcal/mol) |
| compound231 | 1                 | -9                  | -9.8                | -10.1               |
| compound313 | 1                 | -9.2                | -10.9               | -10                 |
| compound103 | 0                 | -8.9                | -9.5                | -10                 |
| compound312 | 1                 | -9.2                | -10.5               | -9.9                |
| compound174 | 0                 | -11.6               | -9.8                | -9.9                |
| compound229 | 1                 | -9.4                | -9.3                | -9.8                |
| compound278 | 1                 | -9.9                | -10.7               | -9.7                |
| compound286 | 1                 | -9.2                | -8.8                | -9.7                |
| compound88  | 0                 | -11                 | -9.5                | -9.6                |
| compound230 | 1                 | -9.3                | -9.5                | -9.6                |
| compound101 | 0                 | -9.8                | -9.4                | -9.6                |
| compound284 | 1                 | -9.7                | -9.6                | -9.5                |
| compound122 | 0                 | -8.8                | -8.3                | -9.4                |
| compound97  | 0                 | -10.1               | -8.2                | -9.4                |
| compound125 | 0                 | -9                  | -8.2                | -9.4                |
| compound29  | 0                 | -8.2                | -9.2                | -9.3                |
| compound109 | 0                 | -7.6                | -9.2                | -9.3                |
| compound289 | 1                 | -10.3               | -8.9                | -9.3                |
| compound105 | 0                 | -9.2                | -8.7                | -9.3                |
| compound290 | 1                 | -9.7                | -8.2                | -9.3                |
| compound236 | 1                 | -8.9                | -9.6                | -9.2                |
| compound37  | 0                 | -10.1               | -9.3                | -9.2                |
| compound258 | 1                 | -8.7                | -9.3                | -9.2                |

|             |   |       |       |      |
|-------------|---|-------|-------|------|
| compound255 | 1 | -9.3  | -9.2  | -9.1 |
| compound251 | 1 | -9.4  | -9.1  | -9.1 |
| compound99  | 0 | -9.2  | -9.1  | -9.1 |
| compound200 | 0 | -9.8  | -8.7  | -9.1 |
| compound204 | 0 | -9    | -7.8  | -9.1 |
| compound280 | 1 | -10.1 | -9.3  | -9   |
| compound232 | 1 | -9.1  | -9.2  | -9   |
| compound277 | 1 | -9.7  | -10.4 | -8.9 |
| compound233 | 1 | -9.4  | -9.3  | -8.9 |
| compound190 | 0 | -11   | -9.2  | -8.9 |
| compound306 | 1 | -8.6  | -9    | -8.9 |
| compound250 | 1 | -10   | -8.4  | -8.9 |
| compound135 | 0 | -10.1 | -8.3  | -8.9 |
| compound238 | 1 | -9.5  | -10.7 | -8.8 |
| compound119 | 0 | -9.4  | -9.6  | -8.8 |
| compound199 | 0 | -9.2  | -9.6  | -8.8 |
| compound296 | 1 | -8.9  | -9.3  | -8.8 |
| compound77  | 0 | -8.8  | -9.2  | -8.8 |
| compound31  | 0 | -8.4  | -8.7  | -8.8 |
| compound268 | 1 | -9.3  | -8.1  | -8.8 |
| compound89  | 0 | -10.1 | -7.4  | -8.8 |
| compound134 | 0 | -9.3  | -9.4  | -8.7 |
| compound107 | 0 | -8.4  | -9.4  | -8.7 |
| compound211 | 0 | -8.6  | -9    | -8.7 |
| compound303 | 1 | -8.1  | -8.7  | -8.7 |

|             |   |       |      |      |
|-------------|---|-------|------|------|
| compound281 | 1 | -9.5  | -8.2 | -8.7 |
| compound96  | 0 | -8.6  | -8.2 | -8.7 |
| compound162 | 0 | -9.8  | -7.8 | -8.7 |
| compound52  | 0 | -10.3 | -7.7 | -8.7 |
| compound84  | 0 | -8    | -7.7 | -8.7 |
| compound40  | 0 | -8.8  | -7.6 | -8.7 |
| compound294 | 1 | -8.2  | -8.6 | -8.6 |
| compound108 | 0 | -8.7  | -8.5 | -8.6 |
| compound210 | 0 | -8.5  | -8.5 | -8.6 |
| compound269 | 1 | -8.4  | -8.3 | -8.6 |
| compound220 | 0 | -9.6  | -8.2 | -8.6 |
| compound173 | 0 | -8.9  | -8.2 | -8.6 |
| compound79  | 0 | -8.9  | -7.7 | -8.6 |
| compound292 | 1 | -8.5  | -7.7 | -8.6 |
| compound191 | 0 | -9.8  | -7.5 | -8.6 |
| compound104 | 0 | -9.4  | -9.2 | -8.5 |
| compound237 | 1 | -8.5  | -8.9 | -8.5 |
| compound198 | 0 | -8.3  | -8.7 | -8.5 |
| compound308 | 1 | -8    | -8.7 | -8.5 |
| compound118 | 0 | -9.7  | -8.5 | -8.5 |
| compound282 | 1 | -9    | -8.4 | -8.5 |
| compound267 | 1 | -9.4  | -8.1 | -8.5 |
| compound81  | 0 | -9.3  | -8.1 | -8.5 |
| compound247 | 1 | -8.2  | -8.1 | -8.5 |
| compound82  | 0 | -8.2  | -7.5 | -8.5 |

|             |   |       |      |      |
|-------------|---|-------|------|------|
| compound129 | 0 | -8.1  | -6.9 | -8.5 |
| compound288 | 1 | -8.6  | -9.9 | -8.4 |
| compound249 | 1 | -9.5  | -9.4 | -8.4 |
| compound295 | 1 | -10.1 | -9.2 | -8.4 |
| compound283 | 1 | -9.7  | -8.6 | -8.4 |
| compound307 | 1 | -7.8  | -8.6 | -8.4 |
| compound168 | 0 | -9    | -8.4 | -8.4 |
| compound139 | 0 | -8    | -8.3 | -8.4 |
| compound117 | 0 | -8.6  | -8.2 | -8.4 |
| compound169 | 0 | -7.5  | -8.2 | -8.4 |
| compound223 | 1 | -8.7  | -8.1 | -8.4 |
| compound275 | 1 | -8.4  | -8.1 | -8.4 |
| compound279 | 1 | -7.5  | -8   | -8.4 |
| compound86  | 0 | -8.9  | -7.9 | -8.4 |
| compound43  | 0 | -7.9  | -7.8 | -8.4 |
| compound15  | 0 | -9.2  | -7.3 | -8.4 |
| compound297 | 1 | -9.1  | -8.9 | -8.3 |
| compound124 | 0 | -8.5  | -8.8 | -8.3 |
| compound274 | 1 | -10.2 | -8.7 | -8.3 |
| compound36  | 0 | -8.4  | -8.6 | -8.3 |
| compound314 | 1 | -9    | -8.5 | -8.3 |
| compound311 | 1 | -8.7  | -8.4 | -8.3 |
| compound260 | 1 | -8.5  | -8.4 | -8.3 |
| compound256 | 1 | -8.2  | -8.4 | -8.3 |
| compound123 | 0 | -9    | -8.3 | -8.3 |

|             |   |      |      |      |
|-------------|---|------|------|------|
| compound113 | 0 | -8.2 | -8.3 | -8.3 |
| compound310 | 1 | -8.1 | -8.2 | -8.3 |
| compound45  | 0 | -8.4 | -8.1 | -8.3 |
| compound309 | 1 | -8.1 | -8.1 | -8.3 |
| compound293 | 1 | -7.8 | -8.1 | -8.3 |
| compound276 | 1 | -8.1 | -8   | -8.3 |
| compound12  | 0 | -8.7 | -7.9 | -8.3 |
| compound6   | 0 | -8.2 | -7.9 | -8.3 |
| compound137 | 0 | -8.6 | -7.7 | -8.3 |
| compound133 | 0 | -8.9 | -7.5 | -8.3 |
| compound209 | 0 | -8.9 | -9.4 | -8.2 |
| compound144 | 0 | -9.8 | -9.3 | -8.2 |
| compound179 | 0 | -9.3 | -8.8 | -8.2 |
| compound257 | 1 | -8.1 | -8.8 | -8.2 |
| compound95  | 0 | -7.4 | -8.6 | -8.2 |
| compound94  | 0 | -9.8 | -8.4 | -8.2 |
| compound245 | 1 | -8.9 | -8.4 | -8.2 |
| compound302 | 1 | -8.8 | -8.4 | -8.2 |
| compound13  | 0 | -7.2 | -8.3 | -8.2 |
| compound228 | 1 | -9.2 | -8.1 | -8.2 |
| compound68  | 0 | -8.1 | -8.1 | -8.2 |
| compound141 | 0 | -8.1 | -8.1 | -8.2 |
| compound201 | 0 | -8.4 | -8   | -8.2 |
| compound145 | 0 | -8.1 | -8   | -8.2 |
| compound221 | 1 | -8.4 | -7.8 | -8.2 |

|             |   |       |      |      |
|-------------|---|-------|------|------|
| compound273 | 1 | -7.1  | -7.7 | -8.2 |
| compound157 | 0 | -9    | -7.6 | -8.2 |
| compound152 | 0 | -7.7  | -7.6 | -8.2 |
| compound80  | 0 | -7.8  | -7.5 | -8.2 |
| compound301 | 1 | -9    | -8.7 | -8.1 |
| compound254 | 1 | -8.5  | -8.6 | -8.1 |
| compound215 | 0 | -9.3  | -8.4 | -8.1 |
| compound315 | 1 | -8.9  | -8.3 | -8.1 |
| compound243 | 1 | -8.8  | -8.3 | -8.1 |
| compound246 | 1 | -8.8  | -8.3 | -8.1 |
| compound207 | 0 | -8.4  | -8.3 | -8.1 |
| compound34  | 0 | -8    | -8.3 | -8.1 |
| compound143 | 0 | -8.8  | -8.2 | -8.1 |
| compound205 | 0 | -8.1  | -8.2 | -8.1 |
| compound225 | 1 | -9.4  | -8.1 | -8.1 |
| compound265 | 1 | -8.6  | -8.1 | -8.1 |
| compound186 | 0 | -7.7  | -8.1 | -8.1 |
| compound224 | 1 | -9.5  | -8   | -8.1 |
| compound181 | 0 | -9.1  | -7.8 | -8.1 |
| compound56  | 0 | -8.5  | -7.8 | -8.1 |
| compound183 | 0 | -7.9  | -7.8 | -8.1 |
| compound10  | 0 | -9.2  | -7.7 | -8.1 |
| compound46  | 0 | -7.5  | -7.7 | -8.1 |
| compound182 | 0 | -10.3 | -7.6 | -8.1 |
| compound44  | 0 | -8.5  | -7.6 | -8.1 |

|             |   |      |      |      |
|-------------|---|------|------|------|
| compound87  | 0 | -8.5 | -7.6 | -8.1 |
| compound167 | 0 | -8.3 | -7.6 | -8.1 |
| compound78  | 0 | -7.5 | -7.4 | -8.1 |
| compound30  | 0 | -8   | -7   | -8.1 |
| compound259 | 1 | -8.8 | -10  | -8   |
| compound305 | 1 | -9.9 | -9.2 | -8   |
| compound55  | 0 | -8.4 | -8.5 | -8   |
| compound252 | 1 | -9.1 | -8.4 | -8   |
| compound206 | 0 | -7.4 | -8.4 | -8   |
| compound35  | 0 | -8.7 | -8.2 | -8   |
| compound244 | 1 | -8.6 | -8.2 | -8   |
| compound156 | 0 | -8.5 | -8.2 | -8   |
| compound154 | 0 | -8.7 | -8.1 | -8   |
| compound299 | 1 | -8.6 | -8   | -8   |
| compound266 | 1 | -8.5 | -8   | -8   |
| compound41  | 0 | -8.1 | -8   | -8   |
| compound63  | 0 | -7.2 | -8   | -8   |
| compound242 | 1 | -8.7 | -7.8 | -8   |
| compound270 | 1 | -8.5 | -7.8 | -8   |
| compound291 | 1 | -8.2 | -7.8 | -8   |
| compound241 | 1 | -8.7 | -7.7 | -8   |
| compound53  | 0 | -7   | -7.5 | -8   |
| compound317 | 1 | -8.8 | -8.7 | -7.9 |
| compound147 | 0 | -9   | -8.6 | -7.9 |
| compound203 | 0 | -7.9 | -8.4 | -7.9 |



|             |   |      |      |      |
|-------------|---|------|------|------|
| compound14  | 0 | -9.5 | -8.2 | -7.9 |
| compound2   | 0 | -8.6 | -8.2 | -7.9 |
| compound128 | 0 | -8.6 | -8.2 | -7.9 |
| compound264 | 1 | -9.3 | -8.1 | -7.9 |
| compound298 | 1 | -8.5 | -8.1 | -7.9 |
| compound116 | 0 | -9.2 | -7.9 | -7.9 |
| compound33  | 0 | -9.6 | -7.8 | -7.9 |
| compound166 | 0 | -8.3 | -7.8 | -7.9 |
| compound65  | 0 | -8.2 | -7.8 | -7.9 |
| compound7   | 0 | -8.5 | -7.7 | -7.9 |
| compound60  | 0 | -9   | -7.3 | -7.9 |
| compound184 | 0 | -8   | -7.3 | -7.9 |
| compound285 | 1 | -8.1 | -8.6 | -7.8 |
| compound319 | 1 | -8.3 | -8.4 | -7.8 |
| compound62  | 0 | -8.1 | -8.1 | -7.8 |
| compound300 | 1 | -9.5 | -8   | -7.8 |
| compound234 | 1 | -8.3 | -7.8 | -7.8 |
| compound239 | 1 | -8.3 | -7.8 | -7.8 |
| compound112 | 0 | -8.1 | -7.8 | -7.8 |
| compound59  | 0 | -7.8 | -7.8 | -7.8 |
| compound146 | 0 | -7.8 | -7.8 | -7.8 |
| compound240 | 1 | -8.3 | -7.7 | -7.8 |
| compound176 | 0 | -8.2 | -7.6 | -7.8 |
| compound227 | 1 | -8.9 | -7.4 | -7.8 |
| compound195 | 0 | -8.5 | -7.4 | -7.8 |

|             |   |      |      |      |
|-------------|---|------|------|------|
| compound93  | 0 | -7.9 | -7.4 | -7.8 |
| compound66  | 0 | -8.7 | -7.3 | -7.8 |
| compound151 | 0 | -9.4 | -7.1 | -7.8 |
| compound42  | 0 | -8.4 | -7.1 | -7.8 |
| compound261 | 1 | -7.5 | -8.8 | -7.7 |
| compound11  | 0 | -8.1 | -8.3 | -7.7 |
| compound85  | 0 | -9.6 | -8   | -7.7 |
| compound213 | 0 | -7   | -8   | -7.7 |
| compound26  | 0 | -7.6 | -7.9 | -7.7 |
| compound158 | 0 | -8.7 | -7.8 | -7.7 |
| compound235 | 1 | -8.5 | -7.8 | -7.7 |
| compound226 | 1 | -8.8 | -7.7 | -7.7 |
| compound318 | 1 | -8.8 | -7.7 | -7.7 |
| compound161 | 0 | -8.6 | -7.7 | -7.7 |
| compound170 | 0 | -8.6 | -7.7 | -7.7 |
| compound83  | 0 | -7.8 | -7.7 | -7.7 |
| compound114 | 0 | -7.8 | -7.7 | -7.7 |
| compound159 | 0 | -7.9 | -7.6 | -7.7 |
| compound120 | 0 | -7.8 | -7.6 | -7.7 |
| compound102 | 0 | -8.6 | -7.3 | -7.7 |
| compound5   | 0 | -7.9 | -7.1 | -7.7 |
| compound131 | 0 | -9.4 | -7   | -7.7 |
| compound172 | 0 | -8.6 | -8.4 | -7.6 |
| compound149 | 0 | -7.4 | -8   | -7.6 |
| compound140 | 0 | -8.8 | -7.9 | -7.6 |

|             |   |      |      |      |
|-------------|---|------|------|------|
| compound18  | 0 | -8.3 | -7.9 | -7.6 |
| compound316 | 1 | -8.6 | -7.8 | -7.6 |
| compound192 | 0 | -7.5 | -7.8 | -7.6 |
| compound164 | 0 | -9.1 | -7.7 | -7.6 |
| compound58  | 0 | -7.5 | -7.7 | -7.6 |
| compound1   | 0 | -7.9 | -7.6 | -7.6 |
| compound126 | 0 | -7.4 | -7.5 | -7.6 |
| compound136 | 0 | -7.3 | -7.5 | -7.6 |
| compound92  | 0 | -8.5 | -7.4 | -7.6 |
| compound39  | 0 | -7   | -6.4 | -7.6 |
| compound75  | 0 | -8.6 | -7.8 | -7.5 |
| compound148 | 0 | -8.6 | -7.8 | -7.5 |
| compound160 | 0 | -8.3 | -7.8 | -7.5 |
| compound32  | 0 | -8.1 | -7.6 | -7.5 |
| compound111 | 0 | -7.1 | -7.6 | -7.5 |
| compound142 | 0 | -8.5 | -7.5 | -7.5 |
| compound248 | 1 | -8   | -7.5 | -7.5 |
| compound19  | 0 | -7.5 | -7.5 | -7.5 |
| compound132 | 0 | -7.4 | -7.4 | -7.5 |
| compound212 | 0 | -8.2 | -7.3 | -7.5 |
| compound202 | 0 | -8.1 | -7.3 | -7.5 |
| compound216 | 0 | -7.4 | -7   | -7.5 |
| compound262 | 1 | -7.1 | -8.4 | -7.4 |
| compound90  | 0 | -8.2 | -8   | -7.4 |
| compound208 | 0 | -8.8 | -7.7 | -7.4 |

|             |   |      |      |      |
|-------------|---|------|------|------|
| compound23  | 0 | -8.8 | -7.6 | -7.4 |
| compound214 | 0 | -8.1 | -7.5 | -7.4 |
| compound130 | 0 | -9.1 | -7.3 | -7.4 |
| compound9   | 0 | -7.7 | -7.2 | -7.4 |
| compound127 | 0 | -7.8 | -7.1 | -7.4 |
| compound16  | 0 | -7.5 | -6.5 | -7.4 |
| compound3   | 0 | -8.1 | -7.9 | -7.3 |
| compound110 | 0 | -8   | -7.7 | -7.3 |
| compound91  | 0 | -7.6 | -7.4 | -7.3 |
| compound222 | 1 | -7.2 | -7.2 | -7.3 |
| compound253 | 1 | -8   | -7.1 | -7.3 |
| compound153 | 0 | -7.2 | -7.1 | -7.3 |
| compound304 | 1 | -8.1 | -8   | -7.2 |
| compound49  | 0 | -8   | -7.9 | -7.2 |
| compound21  | 0 | -7.7 | -7.7 | -7.2 |
| compound47  | 0 | -7.6 | -7.5 | -7.2 |
| compound187 | 0 | -7.2 | -7.5 | -7.2 |
| compound24  | 0 | -7.4 | -7.4 | -7.2 |
| compound138 | 0 | -7.2 | -7.4 | -7.2 |
| compound272 | 1 | -7   | -7.3 | -7.2 |
| compound177 | 0 | -6.5 | -7.3 | -7.2 |
| compound185 | 0 | -7.6 | -7.2 | -7.2 |
| compound263 | 1 | -8.2 | -7   | -7.2 |
| compound218 | 0 | -8   | -6.9 | -7.2 |
| compound4   | 0 | -7.1 | -6.8 | -7.2 |

|             |   |      |      |      |
|-------------|---|------|------|------|
| compound165 | 0 | -8   | -6.7 | -7.2 |
| compound38  | 0 | -7.8 | -8.2 | -7.1 |
| compound121 | 0 | -7.7 | -7.8 | -7.1 |
| compound287 | 1 | -8.3 | -7.5 | -7.1 |
| compound22  | 0 | -7.3 | -7.5 | -7.1 |
| compound70  | 0 | -8.7 | -7.3 | -7.1 |
| compound163 | 0 | -7.8 | -7.3 | -7.1 |
| compound150 | 0 | -9.2 | -7.2 | -7.1 |
| compound196 | 0 | -8.1 | -7.2 | -7.1 |
| compound217 | 0 | -7.3 | -7   | -7.1 |
| compound72  | 0 | -8   | -6.9 | -7.1 |
| compound178 | 0 | -7.7 | -6.8 | -7.1 |
| compound189 | 0 | -7.8 | -6.7 | -7.1 |
| compound219 | 0 | -8.3 | -7.5 | -7   |
| compound193 | 0 | -7.3 | -7.5 | -7   |
| compound67  | 0 | -8.4 | -7.4 | -7   |
| compound8   | 0 | -8.6 | -7.2 | -7   |
| compound25  | 0 | -7.3 | -7.2 | -7   |
| compound106 | 0 | -7.8 | -7.1 | -7   |
| compound100 | 0 | -6.9 | -6.3 | -7   |
| compound73  | 0 | -7.2 | -8   | -6.9 |
| compound194 | 0 | -6.7 | -7.4 | -6.9 |
| compound54  | 0 | -7.2 | -7.2 | -6.9 |
| compound76  | 0 | -6.6 | -6.8 | -6.9 |
| compound197 | 0 | -6.5 | -6.7 | -6.9 |

|             |   |      |       |       |
|-------------|---|------|-------|-------|
| compound180 | 0 | -7.4 | -6.6  | -6.9  |
| compound271 | 1 | -6.7 | -7.3  | -6.8  |
| compound20  | 0 | -6.8 | -6.9  | -6.8  |
| compound27  | 0 | -6.6 | -7.8  | -6.7  |
| compound57  | 0 | -7.4 | -7.4  | -6.7  |
| compound50  | 0 | -7.8 | -7.2  | -6.7  |
| compound188 | 0 | -7.2 | -6.8  | -6.7  |
| compound51  | 0 | -7.1 | -6.8  | -6.7  |
| compound115 | 0 | -6.6 | -6.6  | -6.7  |
| compound155 | 0 | -6.9 | -6.3  | -6.7  |
| compound175 | 0 | -7.7 | -6.9  | -6.6  |
| compound98  | 0 | -7.6 | -6.8  | -6.6  |
| compound64  | 0 | -7.7 | -7.1  | -6.5  |
| compound71  | 0 | -6.9 | -7    | -6.5  |
| compound171 | 0 | -7.3 | -6.4  | -6.5  |
| compound28  | 0 | -7.1 | -6.3  | -6.5  |
| compound74  | 0 | -7.6 | -6.5  | -6.4  |
| compound17  | 0 | -7   | -6.5  | -6.4  |
| compound61  | 0 | -6.2 | -6.7  | -6.1  |
| compound69  | 0 | -6.2 | -6.3  | -6.1  |
| compound48  | 0 | -7.1 | -6    | -6.1  |
| compound231 | 1 | -9   | -9.8  | -10.1 |
| compound313 | 1 | -9.2 | -10.9 | -10   |

---

<sup>a</sup> 0 represents the inactive compound; 1 represents the active compound

**Table S2. The information of 13 hit compounds**

| Compd.        | Structure                                                                           | Affinity<br>(Kcal/mol) | Source |
|---------------|-------------------------------------------------------------------------------------|------------------------|--------|
| D008-10042524 | 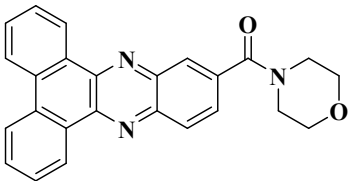   | -10.1                  | Spece  |
| D008-10083445 |    | -9.6                   | Spece  |
| D008-10048904 |   | -9.5                   | Spece  |
| D008-10016012 |  | -9.6                   | Spece  |
| D008-10080218 |  | -9.6                   | Spece  |
| D008-10049026 |  | -10.5                  | Spece  |

D008-10050038

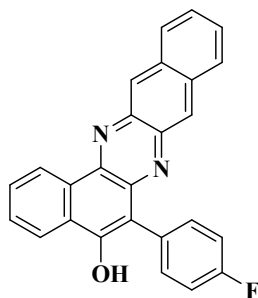

-9.7

Spece

D008-10022050

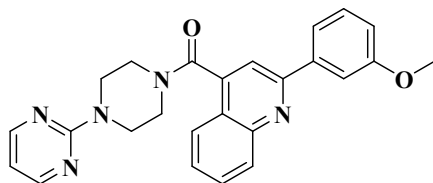

-9.5

Spece

D008-10056747

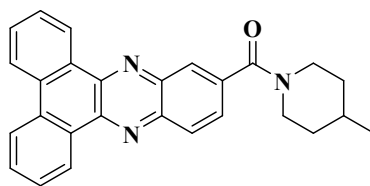

-9.9

Spece

T001-10020615

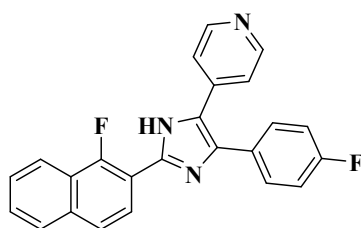

-9.8

Bioactive

Compound  
Library

T001-10013696

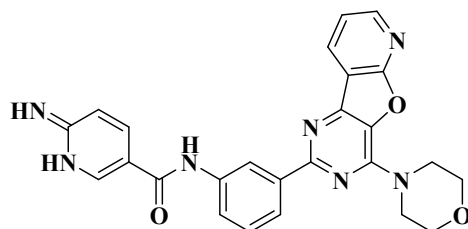

-9.6

Bioactive

Compound  
Library

T001-10013986

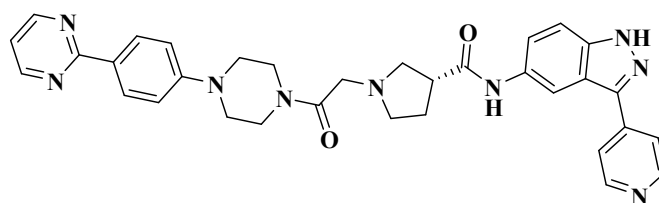

-9.7

Bioactive

Compound  
Library

T001-10026247

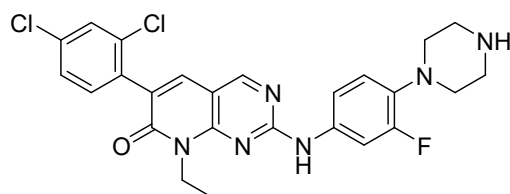

-9.5

Bioactive

Compound  
Library



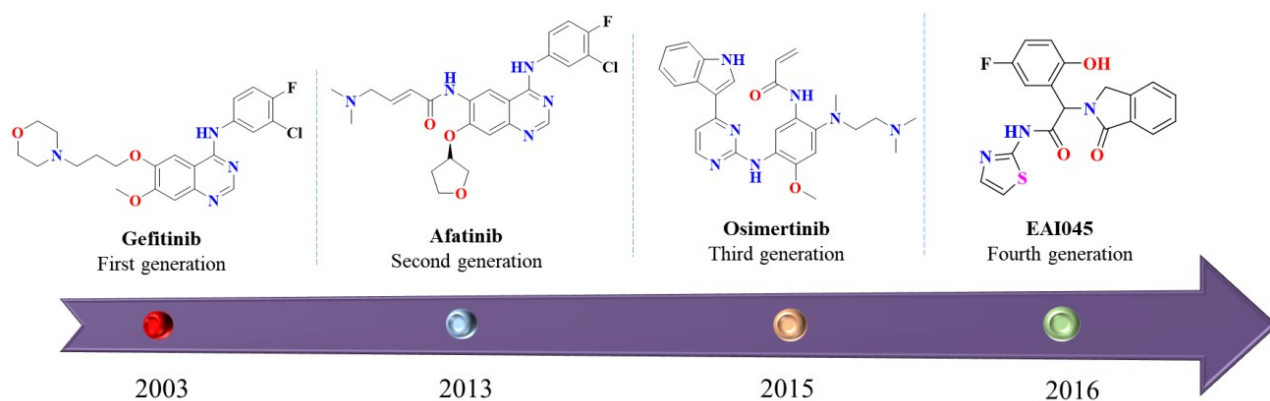

**Figure S1** Typical EGFR inhibitors of the first to fourth generations.

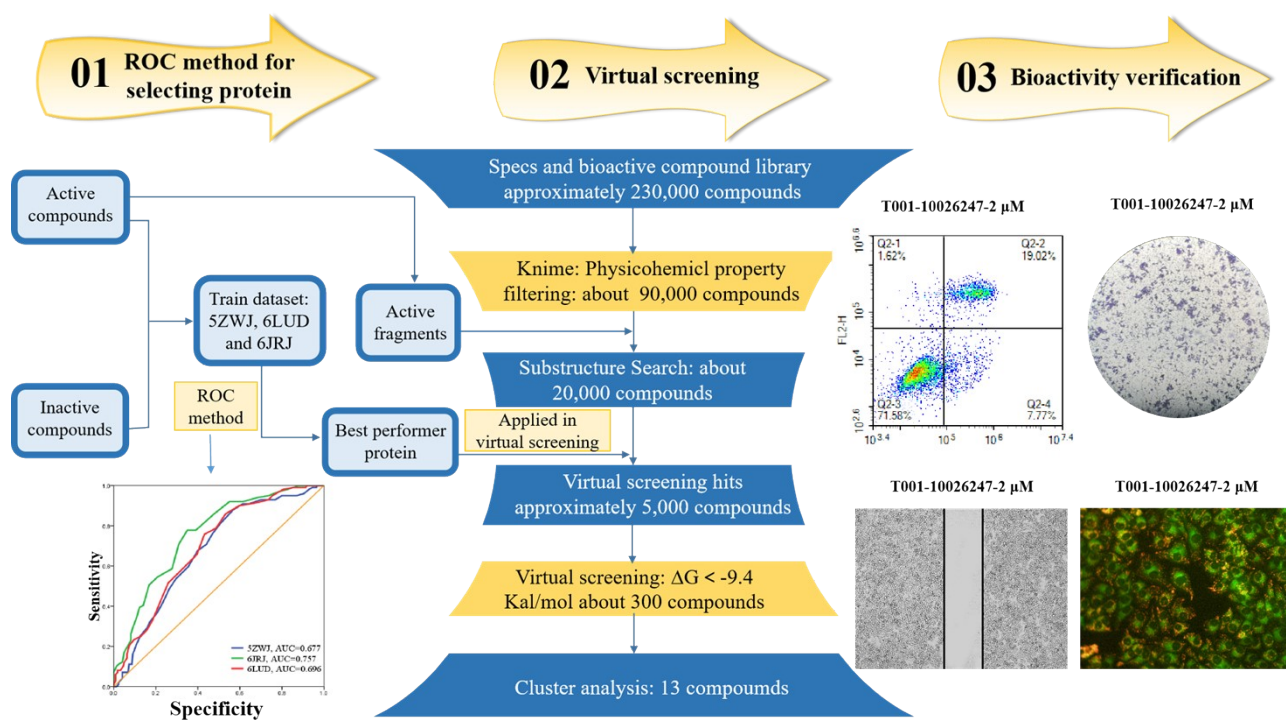

**Figure S2.** The workflow of drug discovery strategy applied to discover active compounds against EGFR target

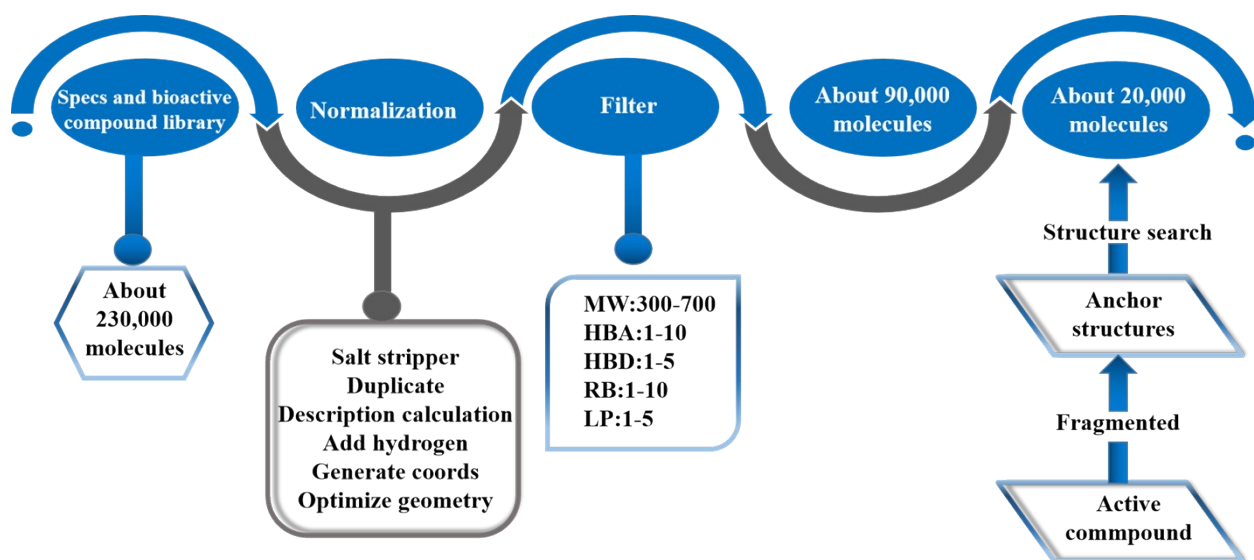

**Figure S3.** Workflow of physicochemical property filtering and substructure search using Knime software.

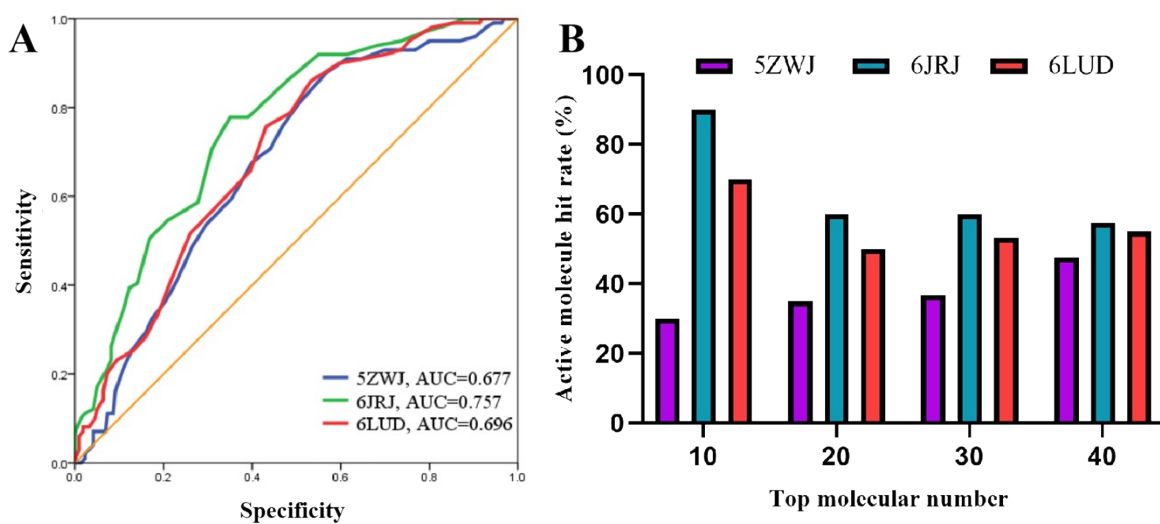

**Figure S4.** (A) Evaluation of the recognition ability of three proteins with Vina by ROC curves; (B) Active compound hits for the three proteins

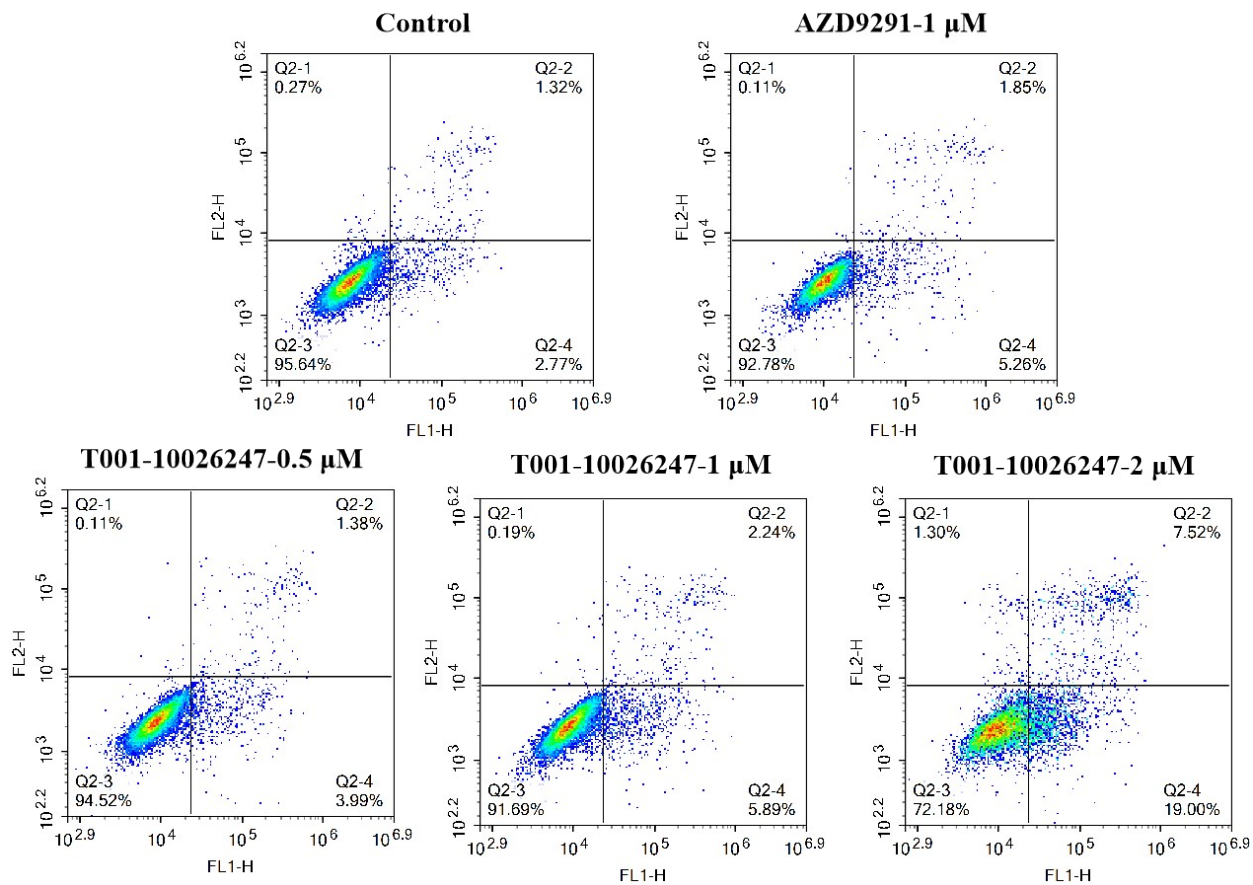

**Figure S5.** Cell-apoptosis analysis of compound **T001-10026247**. (Q2-1: mechanical damage; Q2-2: late apoptotic; Q2-3: living cells; Q2-4: early apoptotic).

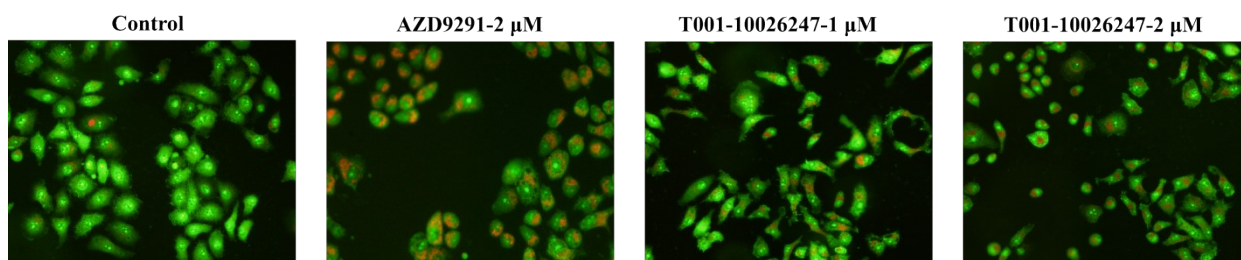

**Figure S6.** Cell morphology observed by fluorescence microscopy of compound **T001-10026247**

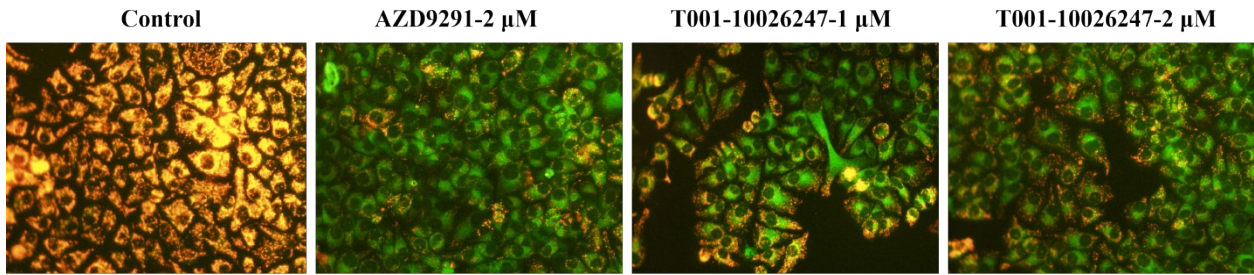

**Figure S7.** Fluorescent probe JC-1 detects the induction of apoptosis in H1975 cells by compound **T001-10026247**.

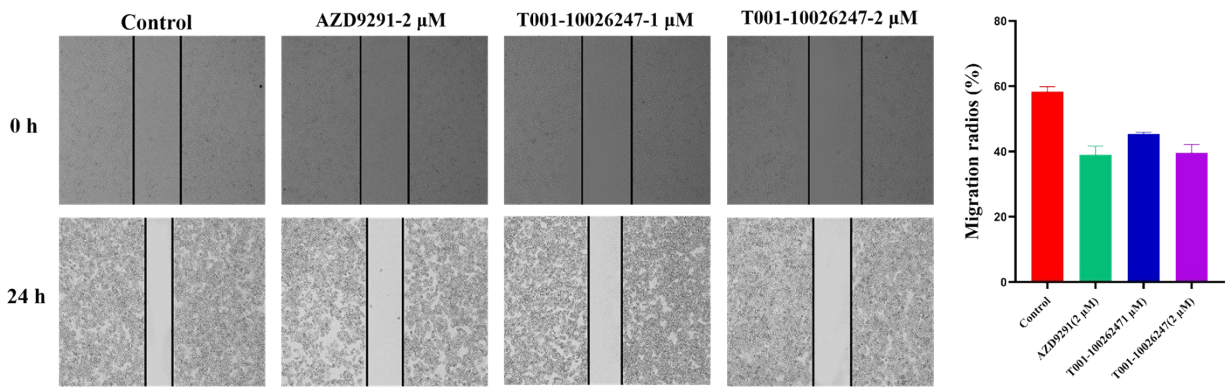

**Figure S8.** *In vitro* wound healing assays were performed on H1975 cells with different concentrations of **T001-10026247**. Quantitative analyses of the percentage of wound closure at 24 h compared with 0 h were shown on the right.

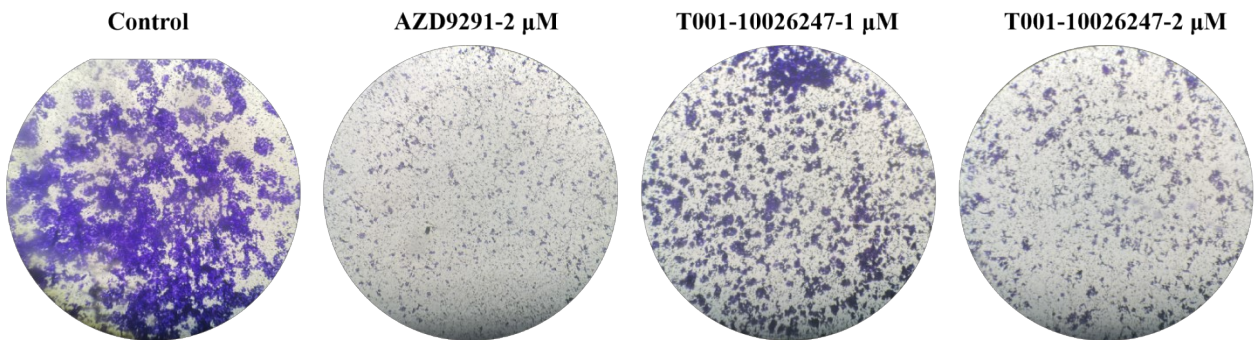

**Figure S9.** Transwell assay of cell invasion.

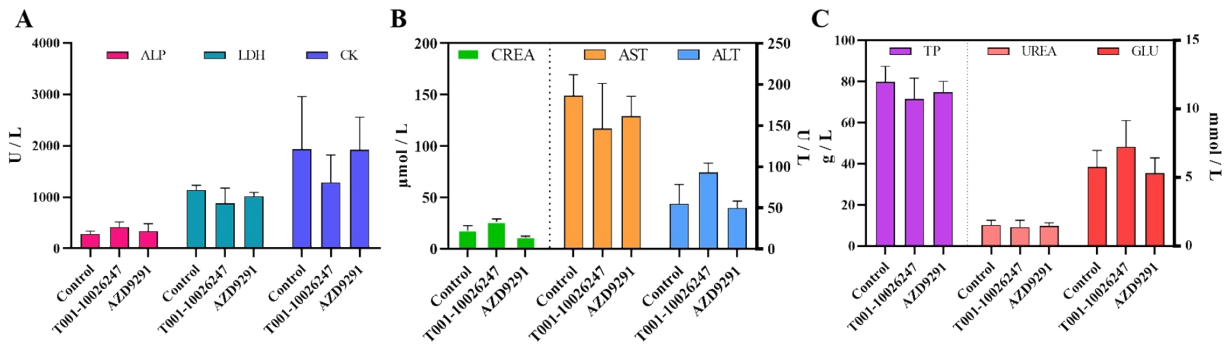

**Figure S10.** The results of blood biochemical analysis of mice in the blank group (0.9% saline), positive administration group (AZD9291, 70 mg/kg) and T001-10026247 (70 mg/kg) administration group. (A) ALP, LDH, CK; (B) CREA, AST, ALT; (C) TP, UREA, GLU.

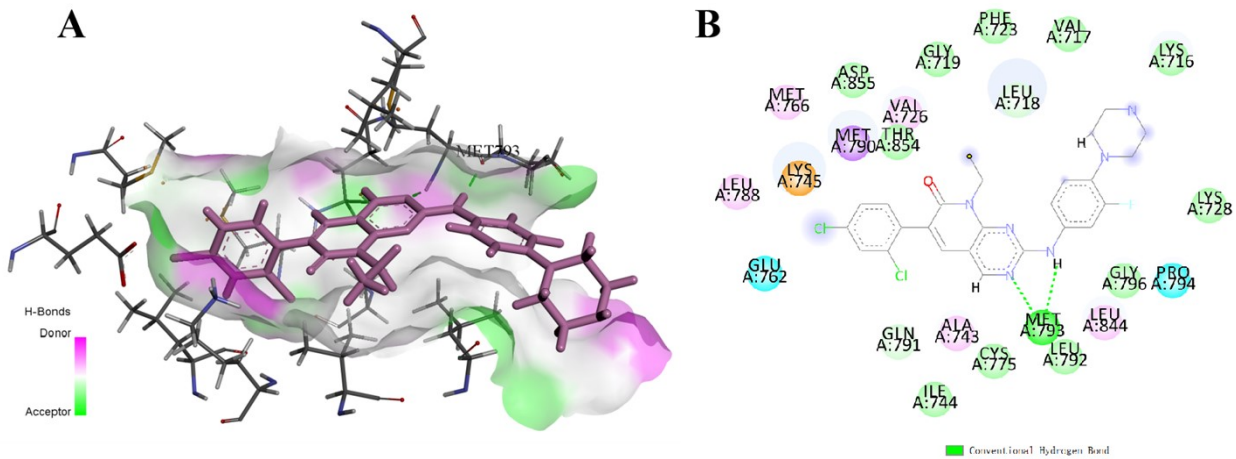

**Figure S11.** (A) The binding mode of compound T001-10026247 with protein 6JRJ is as follows (3D). (B) The binding mode of compound T001-10026247 with protein 6JRJ is as follows (2D).

**Table S3.** Cell proliferation activity evaluation of hit compounds in H1975, A549 and H460 cells.

| Compd.                     | IC <sub>50</sub> ( $\mu$ M $\pm$ SD) <sup>a</sup> |                                  |                                  |
|----------------------------|---------------------------------------------------|----------------------------------|----------------------------------|
|                            | H1975                                             | A549                             | H460                             |
| D008-10042524              | 78.33 $\pm$ 7.53                                  | >100                             | >100                             |
| D008-10083445              | >100                                              | >100                             | >100                             |
| D008-10048904              | <b>17.32<math>\pm</math>1.87</b>                  | <b>30.47<math>\pm</math>3.67</b> | <b>25.58<math>\pm</math>2.52</b> |
| D008-10016012              | >100                                              | 85.53 $\pm$ 9.65                 | 98.53 $\pm$ 10.41                |
| D008-10080218              | <b>37.90<math>\pm</math>4.09</b>                  | <b>34.68<math>\pm</math>4.24</b> | <b>41.52<math>\pm</math>4.86</b> |
| D008-10049026              | >100                                              | 51.58 $\pm$ 5.74                 | >100                             |
| D008-10050038              | >100                                              | 65.86 $\pm$ 7.31                 | 53.80 $\pm$ 52.98                |
| D008-10135686              | <b>16.78<math>\pm</math>2.35</b>                  | <b>15.12<math>\pm</math>2.03</b> | <b>35.37<math>\pm</math>4.23</b> |
| D008-10056747              | >100                                              | >100                             | >100                             |
| T001-10020615              | 77.93 $\pm$ 6.98                                  | 68.44 $\pm$ 6.90                 | 82.41 $\pm$ 9.21                 |
| T001-10013696              | <b>43.42<math>\pm</math>4.21</b>                  | <b>41.97<math>\pm</math>4.56</b> | <b>35.84<math>\pm</math>5.72</b> |
| T001-10013986              | >100                                              | >100                             | >100                             |
| T001-10026247              | <b>0.26<math>\pm</math>0.01</b>                   | <b>0.74<math>\pm</math>0.08</b>  | <b>2.65<math>\pm</math>0.22</b>  |
| <b>AZD9291<sup>b</sup></b> | 4.951 $\pm$ 0.51                                  | 4.47 $\pm$ 0.45                  | 5.38 $\pm$ 0.49                  |

<sup>a</sup> The values are an average of three separate determinations.

<sup>b</sup> Used as the positive control.

**Table S4.** The activity of hit compounds against EGFR<sup>T790M/C797S/L858R</sup> and EGFR<sup>T790M/L858R</sup>.

| <b>Compd.</b>        | <b>IC<sub>50</sub>(<math>\mu</math>M)</b> |                                   |
|----------------------|-------------------------------------------|-----------------------------------|
|                      | <b>EGFR<sup>T790M/C797S/L858R</sup></b>   | <b>EGFR<sup>T790M/L858R</sup></b> |
| <b>D008-10042524</b> | >10.0                                     | ND                                |
| <b>D008-10083445</b> | >10.0                                     | ND                                |
| <b>D008-10048904</b> | <b>4.82</b>                               | ND                                |
| <b>D008-10016012</b> | >10.0                                     | ND                                |
| <b>D008-10080218</b> | <b>3.18</b>                               | ND                                |
| <b>D008-10049026</b> | >10.0                                     | ND                                |
| <b>D008-10050038</b> | >10.0                                     | ND                                |
| <b>D008-10135686</b> | <b>2.37</b>                               | ND                                |
| <b>D008-10056747</b> | >10.0                                     | ND                                |
| <b>T001-10020615</b> | >10.0                                     | ND                                |
| <b>T001-10013696</b> | <b>3.33</b>                               | ND                                |
| <b>T001-10013986</b> | >10.0                                     | ND                                |
| <b>T001-10026247</b> | <b>2.29</b>                               | <b>1.63</b>                       |

<sup>a</sup>ND: Not done.

## **<sup>1</sup>H, <sup>13</sup>C, HRMS & HPLC-purity spectrum of the compound T001-10026247**

<sup>1</sup>H NMR (400 MHz, DMSO-*d*<sub>6</sub>) δ (ppm) 1.30 (t, J=6.90 Hz, 3 H), 2.88 (s, 4 H), 2.84 (s, 4 H), 4.37 (q, J=7.03 Hz, 2 H), 7.02 (t, J=9.29 Hz, 1 H), 7.36 - 7.59 (m, 3H), 7.73 (d, J=1.51 Hz, 1 H), 7.78 (d, J=15.31 Hz, 1 H), 7.89 (s, 1 H), 8.83(s,1H), 10.25(br.s.,1H), <sup>13</sup>C NMR (101 MHz, DMSO-*d*<sub>6</sub>) δ 160.93, 159.66, 159.15, 156.27, 155.00, 153.85, 136.67,136.10, 135.99, 135.02, 134.63, 133.83, 133.67, 129.18, 127.65, 126.16, 120.28, 116.02, 108.29, 108.03, 106.41, 47.81, 43.36, 36.57, 13.14. LC-MS (HPLC: MeOH/H<sub>2</sub>O (KH<sub>2</sub>PO<sub>4</sub> = 20 mM) = 1:1); tR: 8.252 min, purity: 98.8%. ESI-MS (m/z): [M + H]<sup>-</sup>, calcd for C<sub>25</sub>H<sub>23</sub>Cl<sub>6</sub>FN<sub>6</sub>O: 513.1373, found, 513.1374.

### **<sup>1</sup>H NMR Spectral**

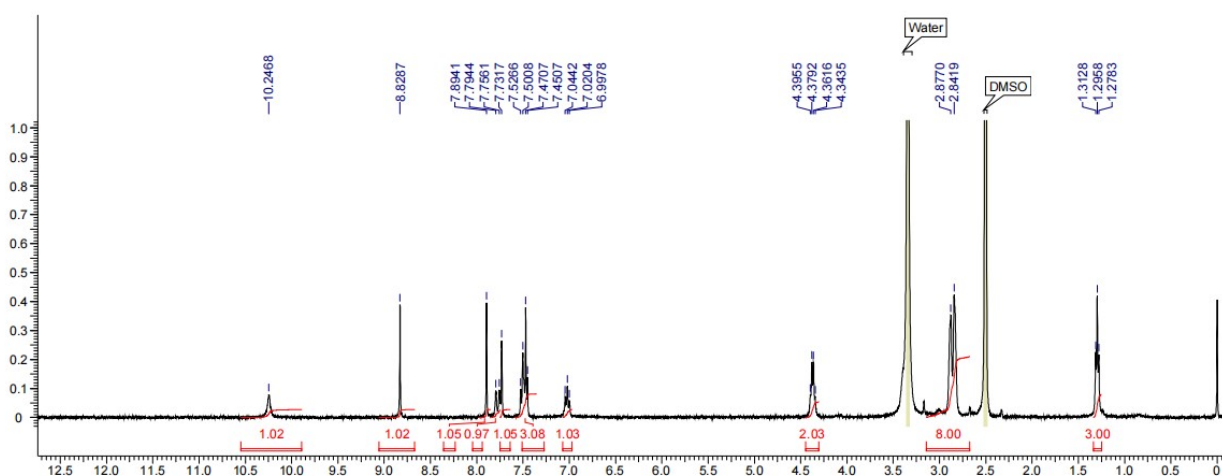

### **<sup>13</sup>C NMR Spectral**

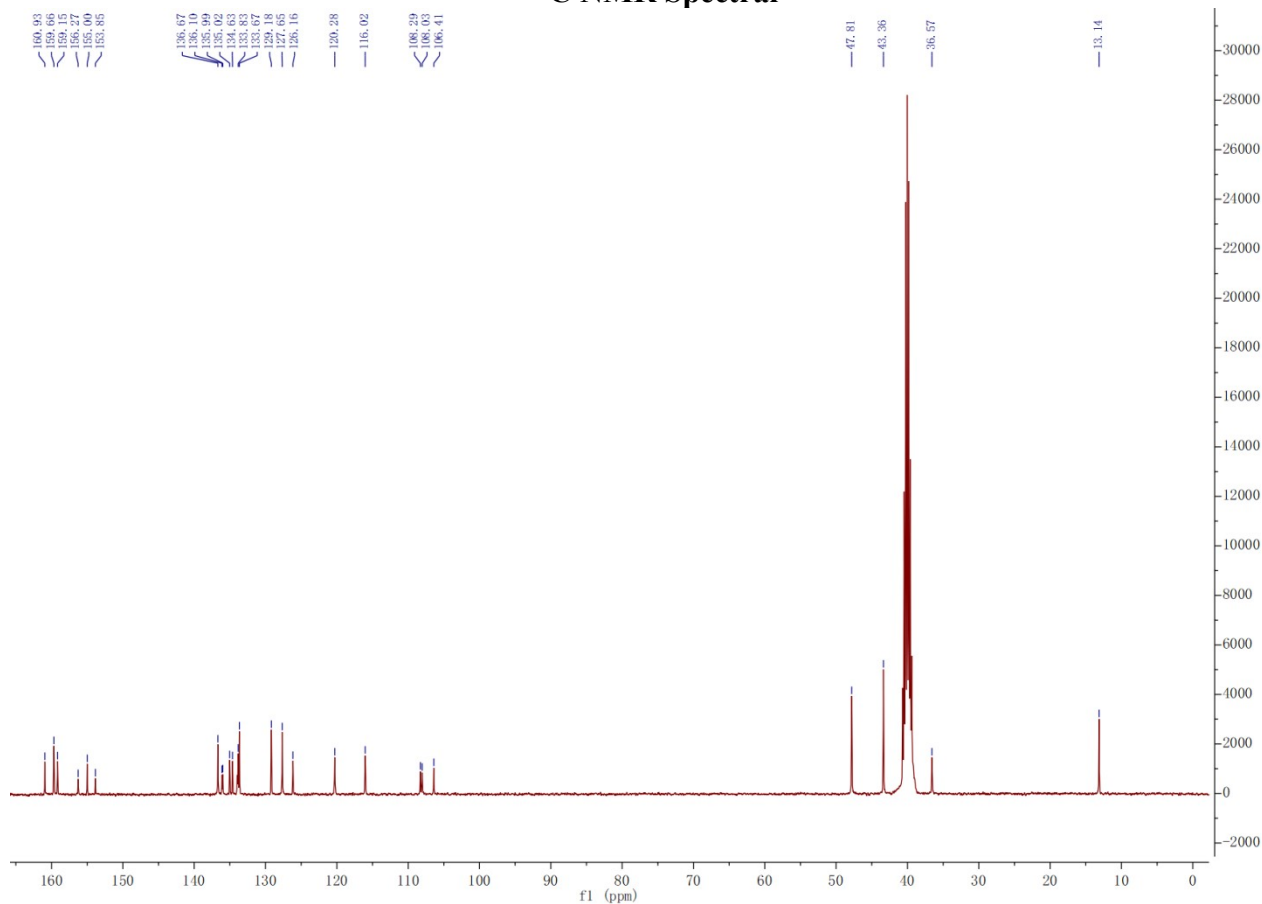



# High resolution mass spectrum

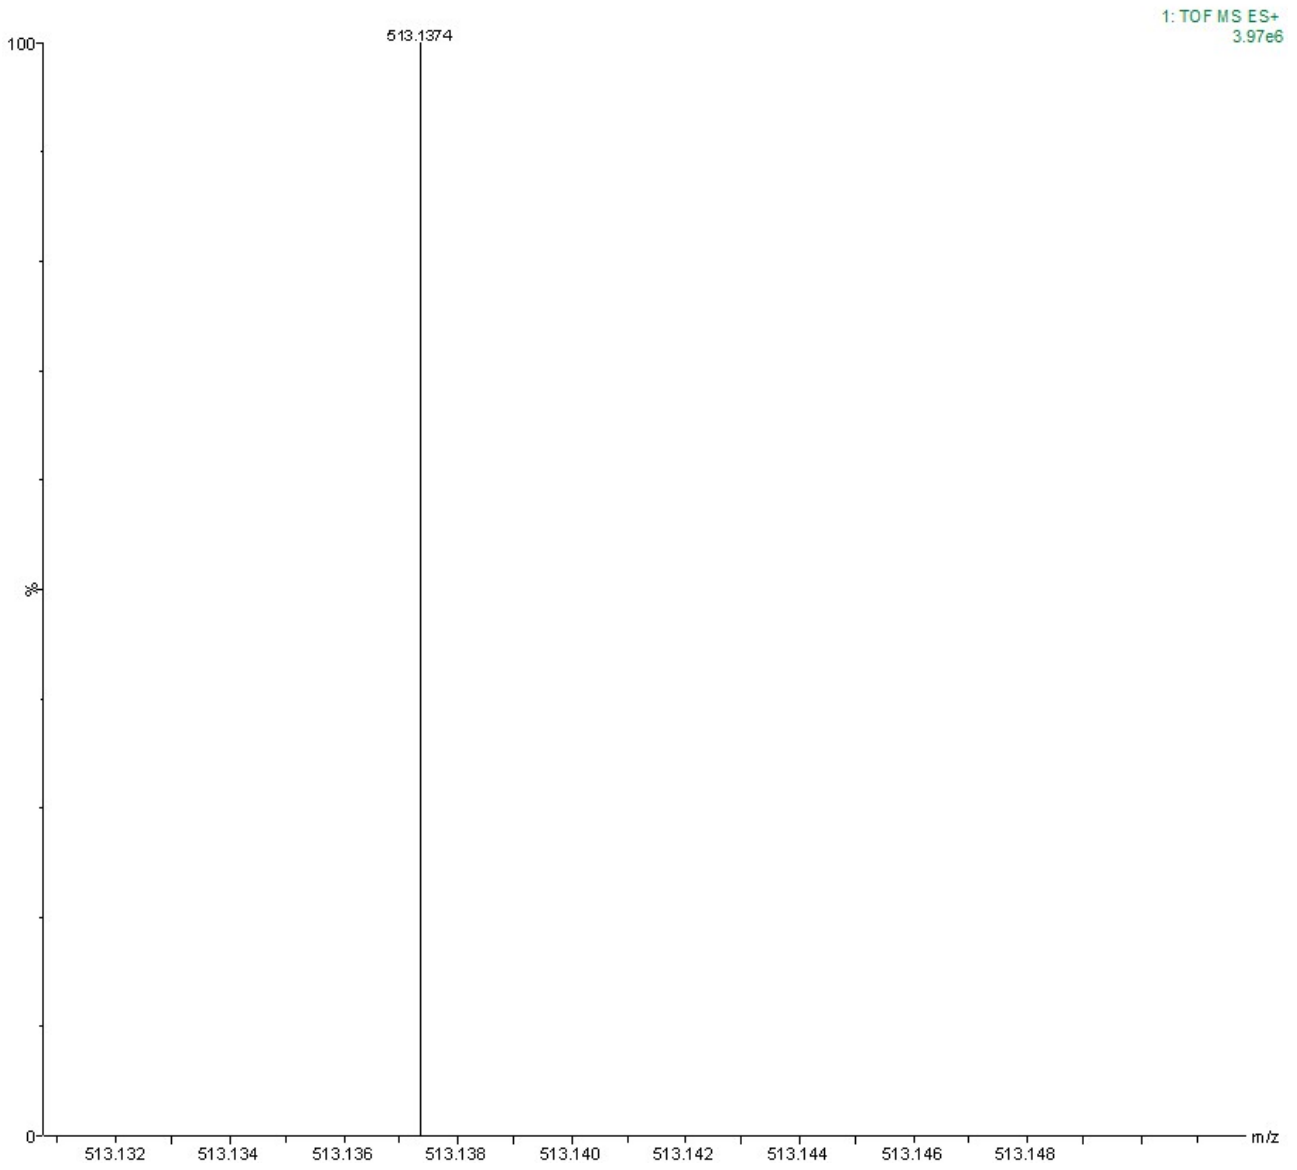

# HPLC-pur

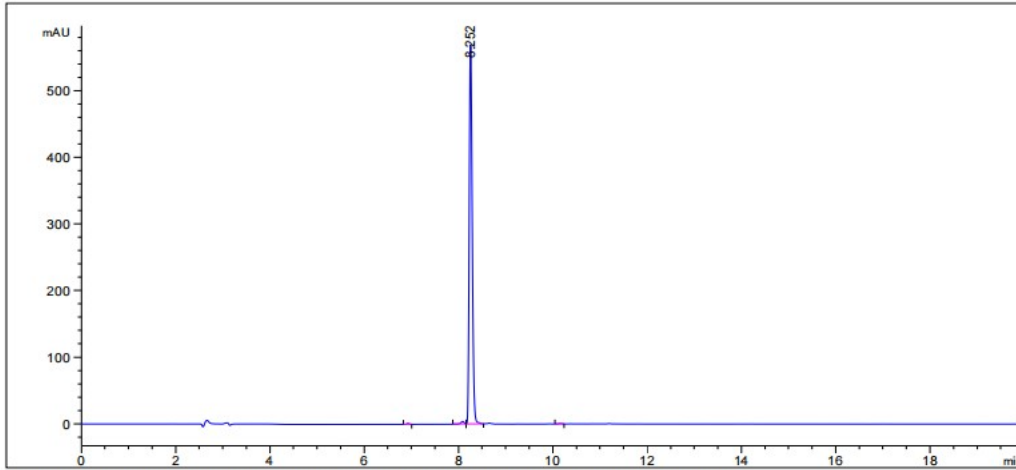

## Area Percent Report

Sorted By : Signal  
Multiplier : 1.0000  
Dilution : 1.0000  
Use Multiplier & Dilution Factor with ISTDs

Signal 1: VWD1 A, Wavelength=365 nm

| Peak # | RetTime [min] | Type | Width [min] | Area [mAU*s] | Height [mAU] | Area %  |
|--------|---------------|------|-------------|--------------|--------------|---------|
| 1      | 6.924         | MM   | 0.0630      | 4.85375      | 1.28319      | 0.1915  |
| 2      | 8.081         | BV   | 0.0768      | 21.07841     | 4.14324      | 0.8318  |
| 3      | 8.252         | VV   | 0.0687      | 2504.21411   | 569.86847    | 98.8193 |
| 4      | 10.158        | MM   | 0.0893      | 3.98793      | 7.44103e-1   | 0.1574  |

Totals : 2534.13421 576.03900

## Proteins and software involved in the manuscript

### Proteins:

6JRJ<sup>1</sup> (DOI: 10.2210/pdb6jrj/pdb) [https://www.wwpdb.org/pdb?id=pdb\\_00006jrj](https://www.wwpdb.org/pdb?id=pdb_00006jrj);

5ZWJ<sup>2</sup> (DOI: 10.2210/pdb5zwj/pdb) [https://www.wwpdb.org/pdb?id=pdb\\_00005zwj](https://www.wwpdb.org/pdb?id=pdb_00005zwj);

6LUD<sup>3</sup> (DOI: 10.2210/pdb6lud/pdb) [https://www.wwpdb.org/pdb?id=pdb\\_00006lud](https://www.wwpdb.org/pdb?id=pdb_00006lud).

### Software:

Vina<sup>4</sup> (<https://vina.scripps.edu/>);

DUD-E<sup>5,6</sup> online application (<http://dude.docking.org/generate>);

Knime<sup>7,8</sup> (<https://www.knime.com/>);

OpenBabel<sup>9</sup> ([http://openbabel.org/wiki/Main\\_Page](http://openbabel.org/wiki/Main_Page));

Discovery Studio<sup>10</sup> (<http://www.discoverystudio.net/>).

## References

- 1 J. Shen, T. Zhang, S.-J. Zhu, M. Sun, L. Tong, M. Lai, R. Zhang, W. Xu, R. Wu and J. Ding, *J. Med. Chem.*, 2019, **62**, 7302–7308.
- 2 P. Zhao, M.-Y. Yao, S.-J. Zhu, J.-Y. Chen and C.-H. Yun, *Biochem. Biophys. Res. Commun.*, 2018, **502**, 332–337.
- 3 K. Kashima, H. Kawauchi, H. Tanimura, Y. Tachibana, T. Chiba, T. Torizawa and H. Sakamoto, *Mol. Cancer Ther.*, 2020, **19**, 2288–2297.
- 4 O. Trott and A. J. Olson, *J. Comput. Chem.*, 2010, **31**, 455–461.
- 5 J. Yang, C. Shen and N. Huang, *Front. Pharmacol.*, 2020, **11**, 69.
- 6 L. Chen, A. Cruz, S. Ramsey, C. J. Dickson, J. S. Duca, V. Hornak, D. R. Koes and T. Kurtzman, *PLoS One*, 2019, **14**, e0220113.
- 7 C. Dietz and M. R. Berthold, *Focus Bio-Image Inform.*, 2016, 179–197.
- 8 M. P. Mazanetz, R. J. Marmon, C. B. T. Reisser and I. Morao, *Curr. Top. Med. Chem.*, 2012, **12**, 1965–1979.
- 9 N. M. O'Boyle, C. Morley and G. R. Hutchison, *Chem. Cent. J.*, 2008, **2**, 1–7.
- 10 John, C, Faver, Melek, N, Ucisik, Wei, Yang, Kenneth and M, *ACS Med. Chem. Lett.*, 2013, **4**, 812–814.
